# Supplementary material for: miR-203 inhibits the traumatic heterotopic ossification by targeting Runx2
Source: PubMed Central journal article supplement (PMC5133990; doi:10.1038/cddis.2016.325), 2016-10-27
Supplement: cddis2016325x1.pdf [file cddis2016325x1.pdf]

# **miR-203 inhibits the traumatic heterotopic ossification by targeting Runx2**

Bing Tu

Shen Liu

Bo Yu

Jing Zhu

Hongjiang Ruan

Tingting Tang

Cunyi Fan

## Supplementary Information

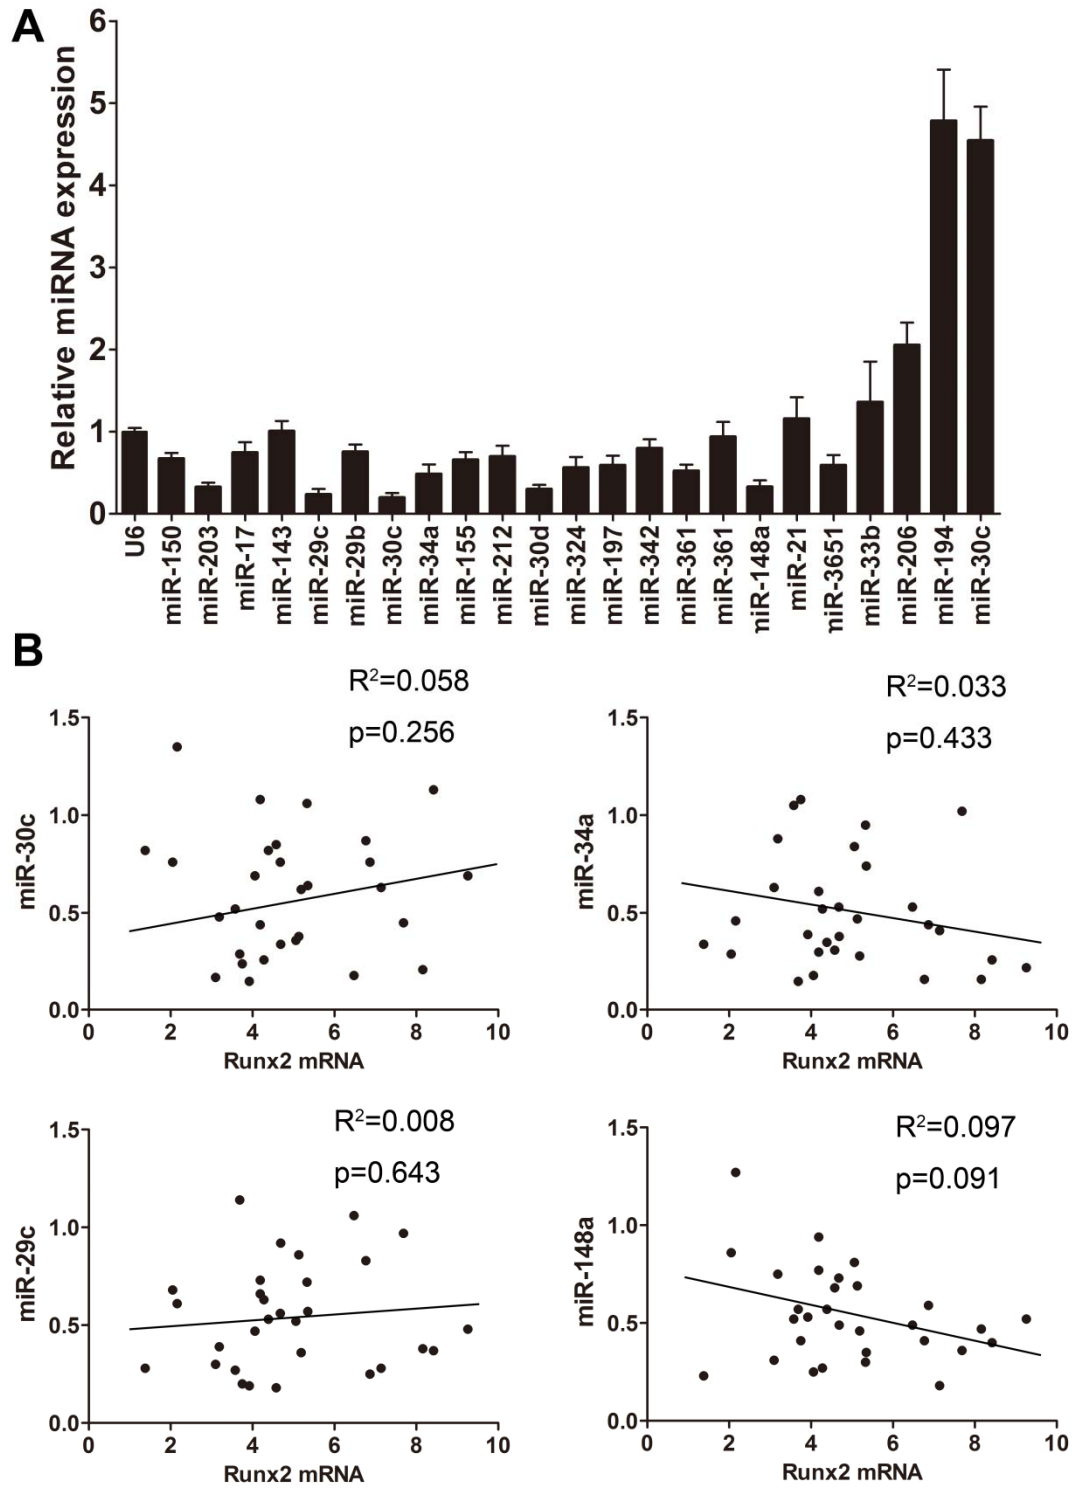

**Supplementary Figure 1. miRNA screening and correlation analysis with Runx2 expression in human HO specimens.** (A) Realtime-PCR analysis of miRNA expression (normalized by U6 in normal bones) in human HO. (B) Correlation analysis between miR-30c, miR-34a, miR-29c and miR-148a levels and Runx2 mRNA levels in human HO specimens.

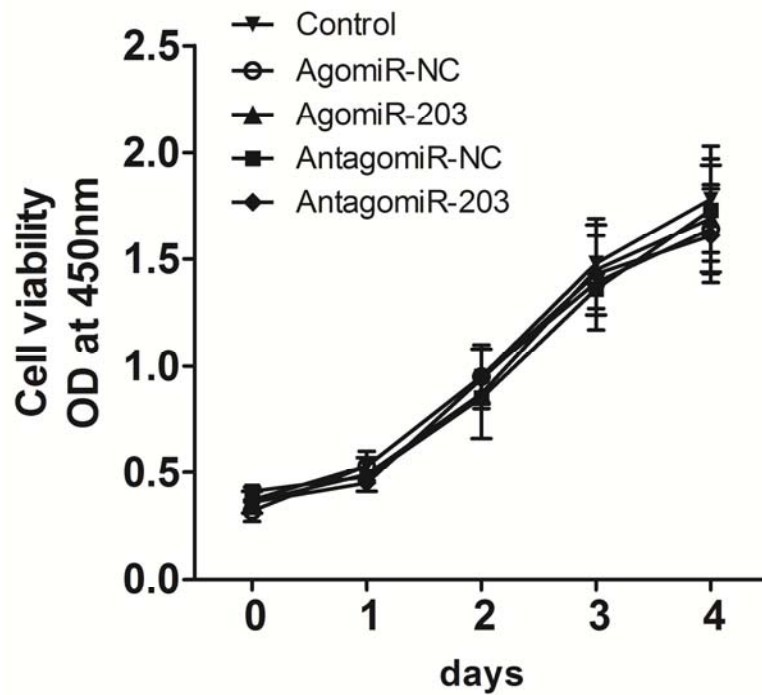

**Supplementary Fig. 2. AgomiR-203 and antagomiR-203 have no effects on the proliferation of osteoblast cells.** The hFOB1.19 osteoblast cells were transfected with agomiR-203 or antagomiR-203. The cell viability was examined by CCK-8 assay after 4 days. (n=3, p>0.05).

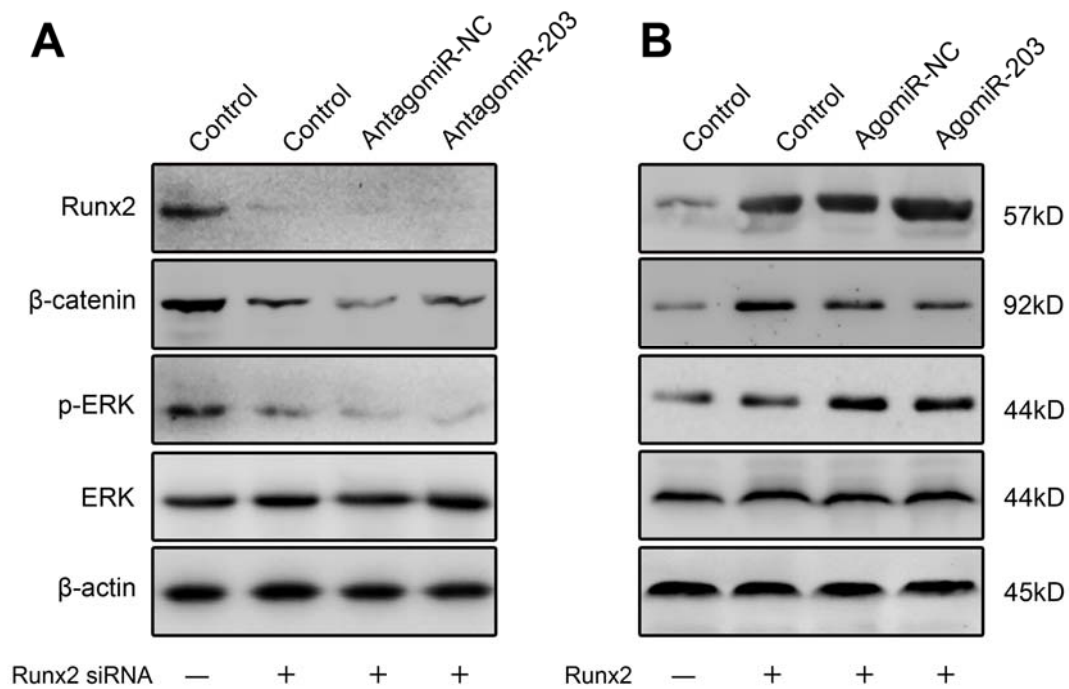

**Supplementary Fig. 3. miR-203 inhibits the ERK and β-catenin signaling**

**in a Runx2-dependent manner.** (A) hFOB1.19 cells were co-transfected with

Runx2 siRNA and antagomiR-203. Western blot analysis of the relative levels

of Runx2, β-catenin, p-ERK and ERK protein expression at 72h. (B) hFOB1.19

cells were co-transfected with Runx2 overexpression plasmid and agomiR-203.

Western blot analysis of the relative levels of Runx2, β-catenin, p-ERK and

ERK protein expression at 72h.

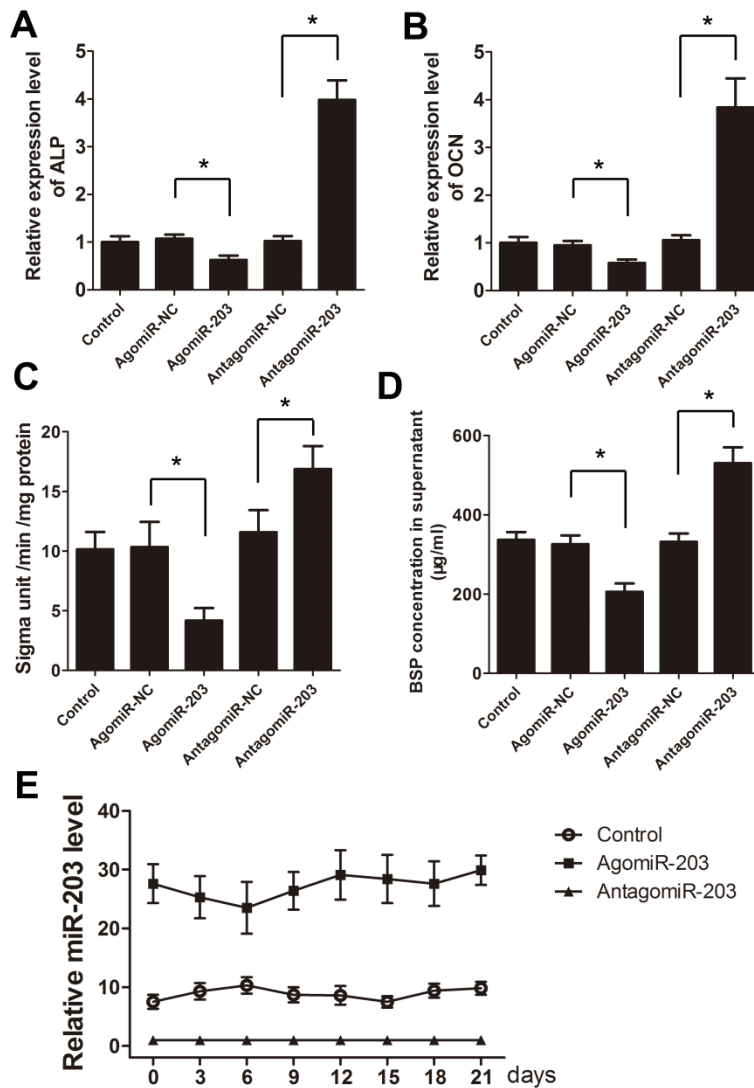

**Supplementary Fig. 4. Effect of miR-203 on the activity of hFOB1.19 osteoblasts.** (A) RT-PCR analysis of the miR-203 level in hFOB1.19 cells after treatment with 200 µM agomiR-203, antagomiR-203 or their NCs for 48 h. (B) RT-PCR analysis of OCN mRNA levels in hFOB1.19 cells after treatment with agomiR-203, antagomiR-203 or their NCs for 48 h. (C) ALP activity was examined in hFOB1.19 cells after treatment with agomiR-203, antagomiR-203 or their NCs for 48 h. (D) ELISA analysis of the BSP protein level in the supernatant of hFOB1.19 cells after treatment with agomiR-203, antagomiR-203

or their NCs for 48 h. (E) Time course of changes in the level of miR-203 as determined by RT-PCR analysis in hFOB1.19 cells after treatment with agomir-203 or antagomir-203 in OM. The data are representative of 3 independent experiments. The data are shown as the means  $\pm$  SD. \* $p < 0.01$ .

**SUPPLEMENTAL TABLES:**

**Supplementary table 1. The RT-PCR primer sequences**

| <b>Genes</b>                  | <b>Primer sequences</b>                |
|-------------------------------|----------------------------------------|
| Runx2                         | forward 5'- CCGCCTCAGTGATTTAGGGC-3'    |
|                               | reverse 5'- GGGTCTGTAATCTGACTCTGTCC-3' |
| $\beta$ -catenin<br>( CTNNB1) | forward 5'-AGCTTCCAGACACGCTATCAT-3'    |
|                               | reverse 5'- CGGTACAACGAGCTGTTTCTAC-3'  |
| ERK<br>(MAPK1)                | forward 5'-TCTGGAGCAGTATTACGACCC -3'   |
|                               | reverse 5'- CTGGCTGGAATCTAGCAGTCT -3'  |
| ALP                           | forward 5'- TGAGGGTGTGGCTTACCAG-3'     |
|                               | reverse 5'- GATGGACGTGTAGGCTTTGCT-3'   |
| OCN                           | forward 5'- CCTCACACTCCTCGCCCTATT-3'   |
|                               | reverse 5'- CCCTCCTGCTTGGACACAAA-3'    |
| GAPDH                         | forward 5'- ATGGGGAAGGTGAAGGTCG-3'     |
|                               | reverse 5'- GGGGTCATTGATGGCAACAATA-3'  |
| miR-203                       | forward 5'- GGGGTGAAATGTTTAGGAC-3'     |
|                               | reverse 5'- CAGTGCGTGTGCGTGGAGT-3'     |
| U6                            | forward 5'-CTCGCTTCGGCAGCACA-3'        |
|                               | reverse 5'-AACGCTTCACGAATTTGCGT-3'     |

**Supplementary table 2. The primers used for cloning the pGL3-Runx2 3' UTR.**

| <b>Gene</b>           | <b>Primer sequence</b>               |
|-----------------------|--------------------------------------|
| <i>Runx2</i> 3'UTR-P1 | forward 5'- TGCGTTTGGCTATGTGTTGT-3'  |
|                       | reverse 5'- GGCAAAGCTGTGTTAGAGGC-3'  |
| <i>Runx2</i> 3'UTR-P2 | forward 5'- TTTGTAGGCCACCCAGCATT-3'  |
|                       | reverse 5'- GCATCCCTAAAGTCACTCGGT-3' |



|                       |                                       |
|-----------------------|---------------------------------------|
| <i>Runx2</i> 3'UTR-P3 | forward 5' - GCAGCAACCCAGAAACACTT-3'  |
|                       | reverse 5' - TGCTACAAAGAGAACCACGCT-3' |
| <i>Runx2</i> 3'UTR-P4 | forward 5' - TGCACTGGGTCATGTGTTTG-3'  |
|                       | reverse 5' - TCAAGGTTTGAAGAAGTGTCT-3' |
